# Supplementary material
Source: publisher figshare collection journal article supplement (https://acs.figshare.com/ndownloader/files/24694493)
Supplement: Supplementary file 1 [file 24694493]

# Supporting Information

## **Two-Dimensional Porous PtPd Nanostructure Electrocatalysts for Oxygen Reduction Reaction**

Xiao Lyu,<sup>⊥</sup> [a]\* Wei-Na Zhang <sup>⊥</sup>[b], Gen Li [a], Bo-Wen Shi[a], Ya-Nan Zhang[a], Hao Chen[a], Si-Cheng Li[a], Xin Wang[c]

<sup>⊥</sup> These authors contributed equally to this work.

[a] School of Materials Science and Engineering, Shenyang Ligong University,  
Shenyang 110159, China

[b] State Key Laboratory of Rolling and Automation, Northeastern University,  
Shenyang, 110819, China

[c] College of Chemical Engineering and Material Science, Zhejiang University of  
Technology, Hangzhou, 310014, China

---

\* Corresponding authors at: School of Materials Science and Engineering, Shenyang Ligong University, Shenyang 110159, China

## Experimental Section

### 1. Synthesis of catalysts

Silica synthesis and array: In the synthesis of silica spheres with diameter of 200 nm, 10 ml of distilled water and 3 ml of ammonia were dissolved in 75 ml of ethanol firstly, then magnetic stirred for 1 hour at 30°C till the homogeneous solution was formed. Subsequently, 6 ml of tetraethylorthosilicate (TEOS) was add to the solution and stirred for another 3 hours till the solution became milky white. Then the silica spheres were separated by centrifugating the solution at 10,000 rpm for 5 min. After that, the obtained solid was re-dispersed in 20 ml of ethanol. Then the quartz substrate was inserted vertically into the solution for 30 seconds and kept at 60°C in vacuum until all solvent vaporized. The synthesis of silica spheres with diameter of 100 and 300 nm were prepared as above, except by using 3 and 9 ml of TEOS respectively.

Impregnation of metal precursors: The aqueous solution mixed with  $\text{PdCl}_2$  (5mM, 2.5 mL) and  $\text{H}_2\text{PtCl}_6$  (0.1M, 5.0 mL) was slowly dropped onto the silica template until the entire template was covered. After drying naturally, continue to repeat the above operation several times until the template dyed to yellow color. After solvent vaporization in vacuum at 50 °C, the as-prepared composite was subsequently heat-treatment in a tube furnace for 3 hours at 500 °C in  $\text{H}_2$  atmosphere to obtain PtPd alloys.

Removal of templates: The  $\text{SiO}_2$  templates were leaching by 20wt.% hydrofluoric acid by stirring for 24 hours. Finally, the PtPd alloying catalysts were collected by centrifugation. For comparison, the pure Pt porous structure was prepared by the same method only used  $\text{H}_2\text{PtCl}_6$  (0.1M, 5.0 mL) impregnated template.

## 2. Characterization

X-ray diffraction (XRD) analysis was tested on Rigaku Ultima IV diffractometer using Cu K $\alpha$  radiation ( $\lambda = 1.54056 \text{ \AA}$ ). Scanning electronic microscopy (SEM) and transition electronic microscopy (TEM) investigations were carried out on a Hitachi S-3400 and JEOL JEM-2100F, respectively. X-ray photoelectron spectroscopy (XPS) was conducted by a Thermo scientific (Escalab 250Xi).

## 3. Electrochemical measurements

The electrochemical tests were conducted using an electrochemical workstation (CHI 760E, Shanghai Chenhua). A Pt wire was used as the counter electrode and a saturated Ag/AgCl electrode was used as the reference electrode. All the potentials in this work were calibrated by referencing to the reversible hydrogen electrode (RHE). Vulcan-72 commercial carbon black were added into PtPd alloys to ensure that the metal mass is 20wt.% of the final catalysts. Then the mixture was dissolved in 10ml ethyl alcohol and ultrasonicated for 2 h at room temperature to ensure uniform dispersion. Afterward, the precipitates were dried at 60 °C in a vacuum oven for 12 h to obtain the final catalyst sample. To prepare the catalyst ink, 3 mg of the catalyst was ultrasonically mixed for 30 min with 40  $\mu\text{L}$  of a 5 wt% Nafion solution (Aldrich), 660  $\mu\text{L}$  of water, and 300  $\mu\text{L}$  of ethanol. From this homogeneous catalyst ink, 10  $\mu\text{L}$  was deposited onto the surface of the GC electrode.

Electrochemically active surface areas (ECSAs) were calculated from the CV curves according to the following equation:

$$E_{CSA} = \frac{Q}{C \times m} \#(1)$$

Where Q is the Coulombic charge of the hydrogen desorption peak area, C is the hydrogen adsorption constant, and m is the mass of the catalyst (Pd, Pt and PdPt). For Pd, C=4.2 C/m<sup>2</sup>; for Pt, C=2.1 C/m<sup>2</sup>; and for Pd<sub>x</sub>Pt<sub>y</sub>, C=4.2x/(x+y) + 2.1y/(x+y).

Koutecky-Levich (K-L) plots were analyzed at different potentials according to Koutecky-Levich equation:

$$\frac{1}{J} = \frac{1}{J_L} + \frac{1}{J_K} = \frac{1}{B\omega^{1/2}} + \frac{1}{J_K} \#(2)$$

$$B = 0.2NFC_0D_0^{2/3}\nu^{-1/6}; J_K = nFkC_0 \#(3)$$

Where J is the measured current density, J<sub>k</sub> and J<sub>L</sub> are the kinetic and limiting current densities, respectively, ω is the angular velocity, n is transferred electron number, F is the Faraday constant, D<sub>0</sub> is the diffusion coefficient of oxygen in 0.1 M KOH, C<sub>0</sub> is the bulk concentration of oxygen, ν is the kinetic viscosity of the electrolyte and k is the electron-transfer rate constant.

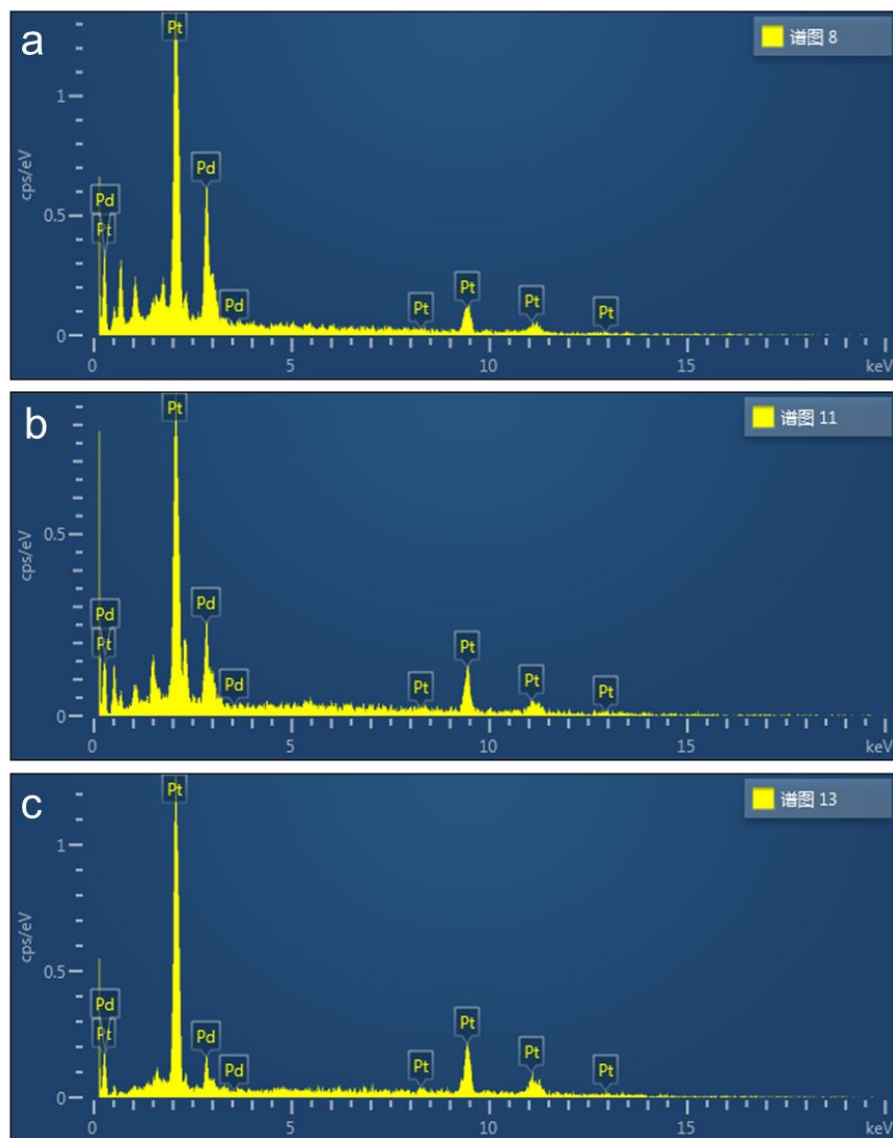

**Figure S1.** The EDS composition analysis of (a) Pt<sub>1</sub>Pd<sub>1</sub>, (b) Pt<sub>2</sub>Pd<sub>1</sub> and (c) Pt<sub>3</sub>Pd<sub>1</sub> respectively.

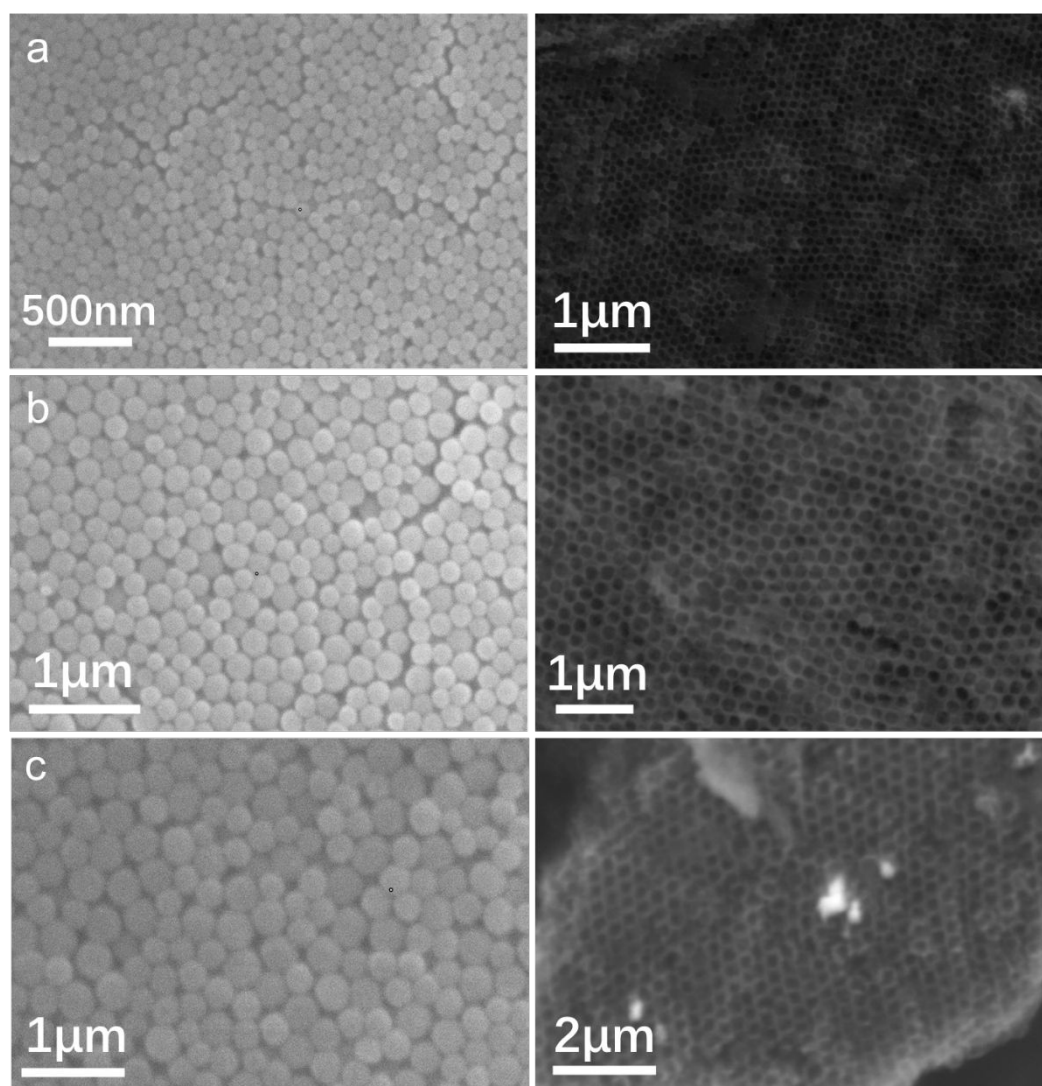

**Figure S2.** SEM images of SiO<sub>2</sub> template with diameter of (a) 100 (b) 200 (c) 200 nm and corresponding TEM images of Pt<sub>2</sub>Pd<sub>1</sub> alloys.

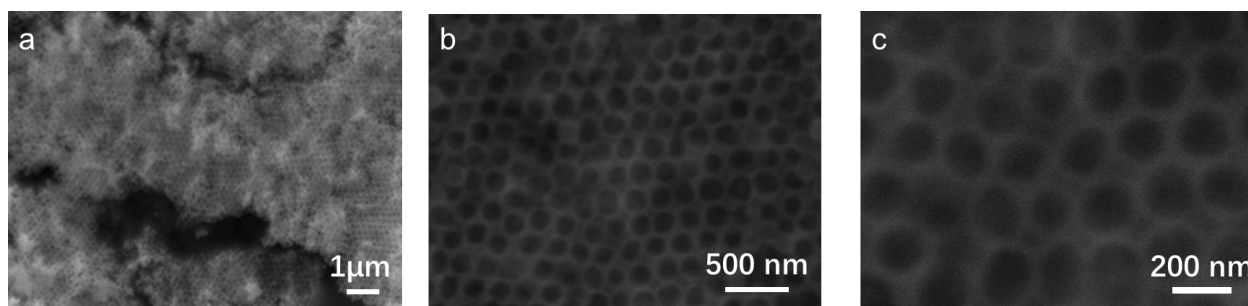

**Figure S3.** The low- (a), medium- (b), and high-resolution (c) SEM images of  $\text{Pt}_2\text{Pd}_1$  alloys.

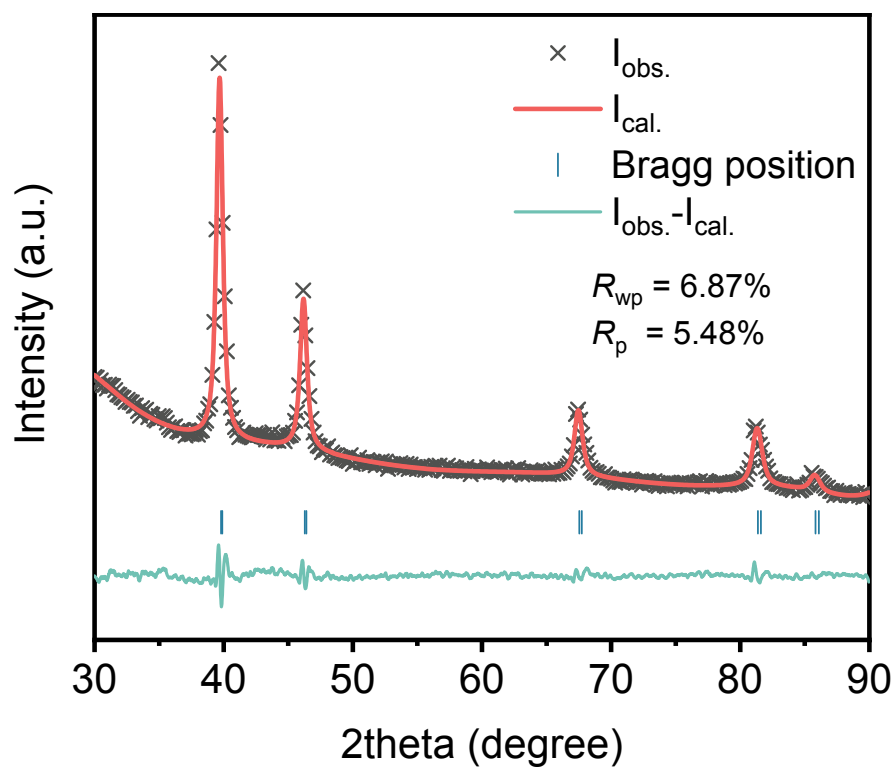

**Figure S4.** Rietveld refinement of  $\text{Pt}_1\text{Pd}_1$  alloy.



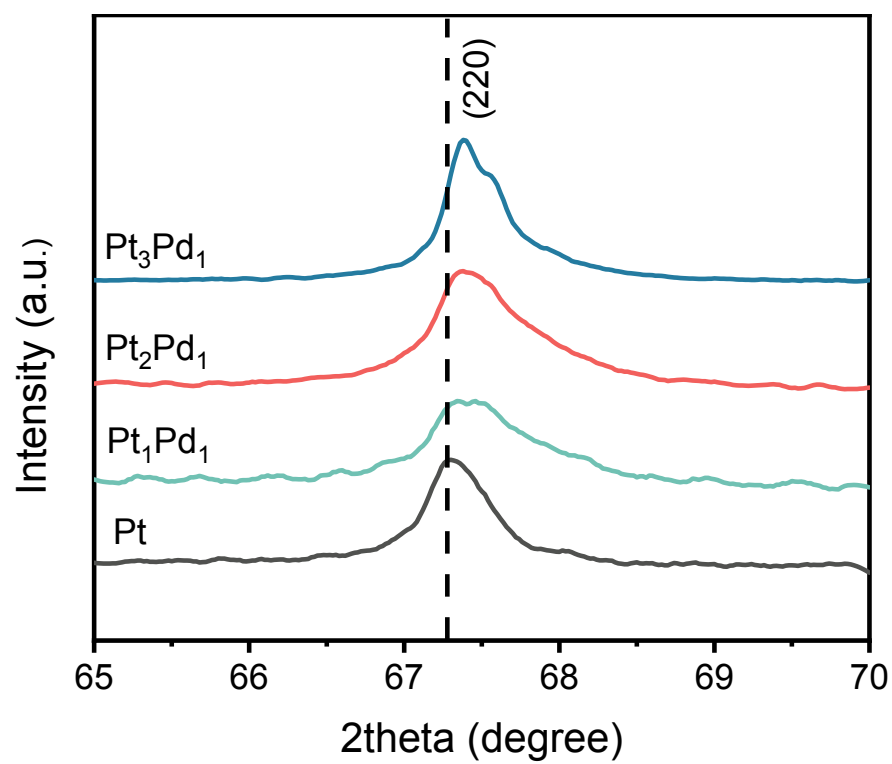

**Figure S5.** XRD results of the (220) reflection for PtPd alloys.

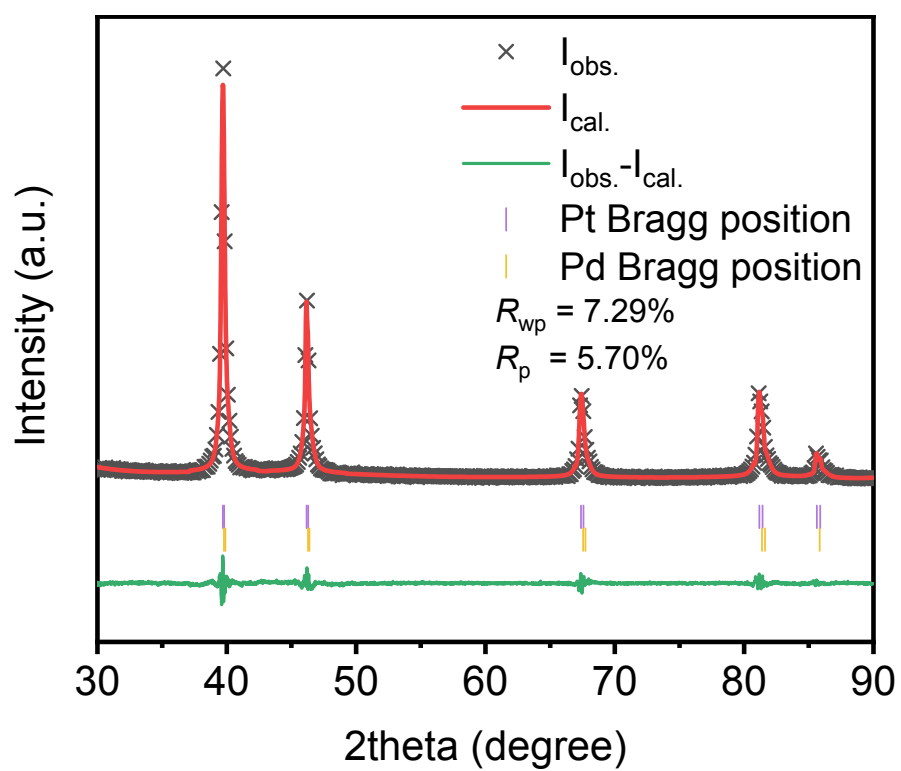

**Figure S6.** Rietveld refinement of  $\text{Pt}_3\text{Pd}_1$  alloy.

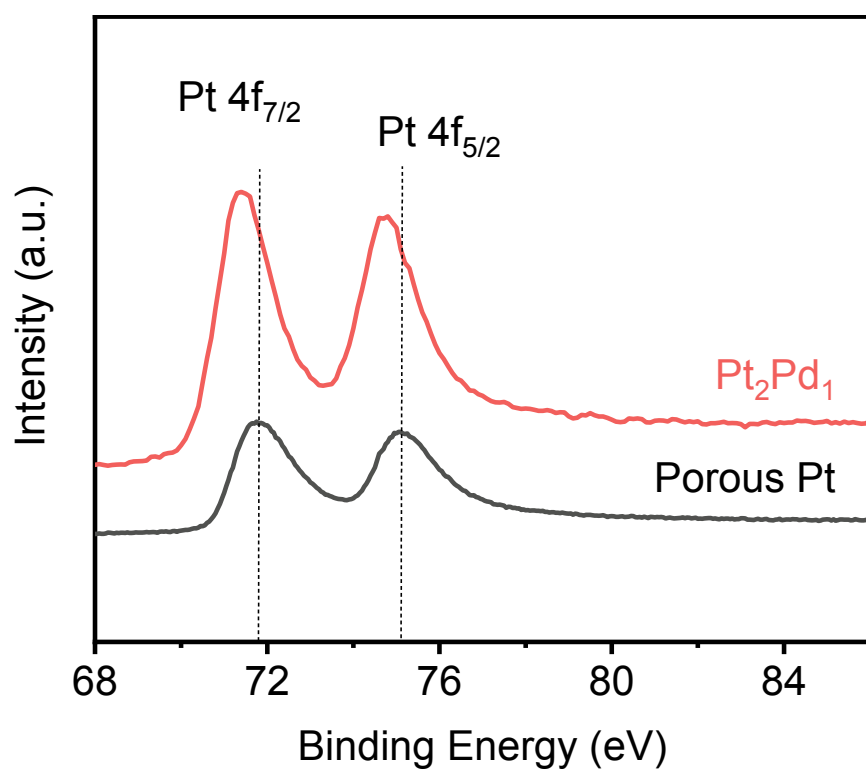

**Figure S7.** XPS spectra of Pt 4f for Pt<sub>2</sub>Pd<sub>1</sub> alloy and porous Pt nanostructure.

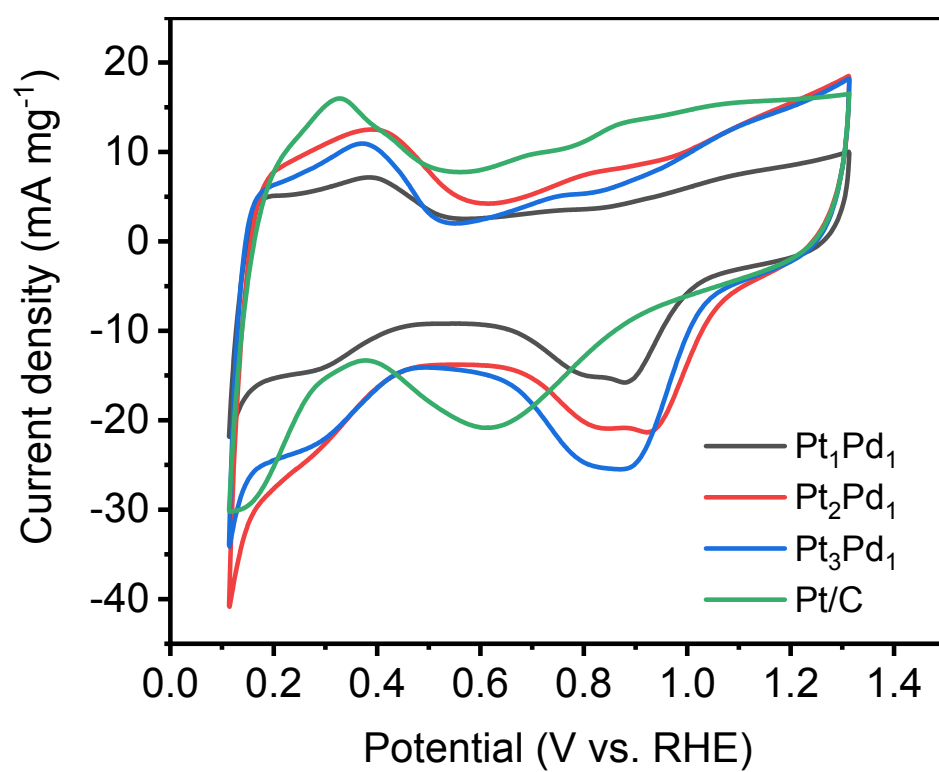

**Figure S8.** CVs of the PtPd catalysts in 0.1M KOH at a scan rate of 20 mV s<sup>-1</sup>.

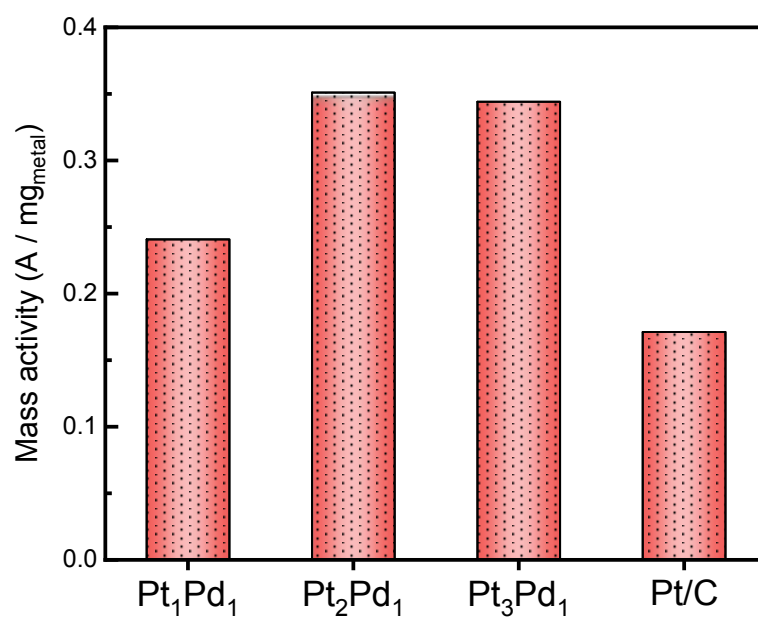

**Figure S9.** MA of the PtPd catalysts and commercial Pt/C in O<sub>2</sub>-saturated 0.1M KOH.

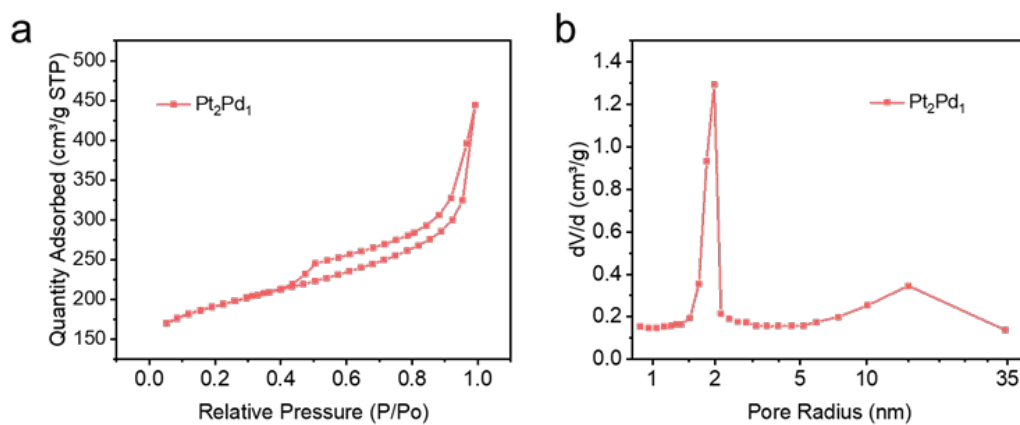

**Figure S10.** (a)  $\text{N}_2$  adsorption-desorption isotherms and (b) pore size distribution of  $\text{Pt}_2\text{Pd}_1$ .

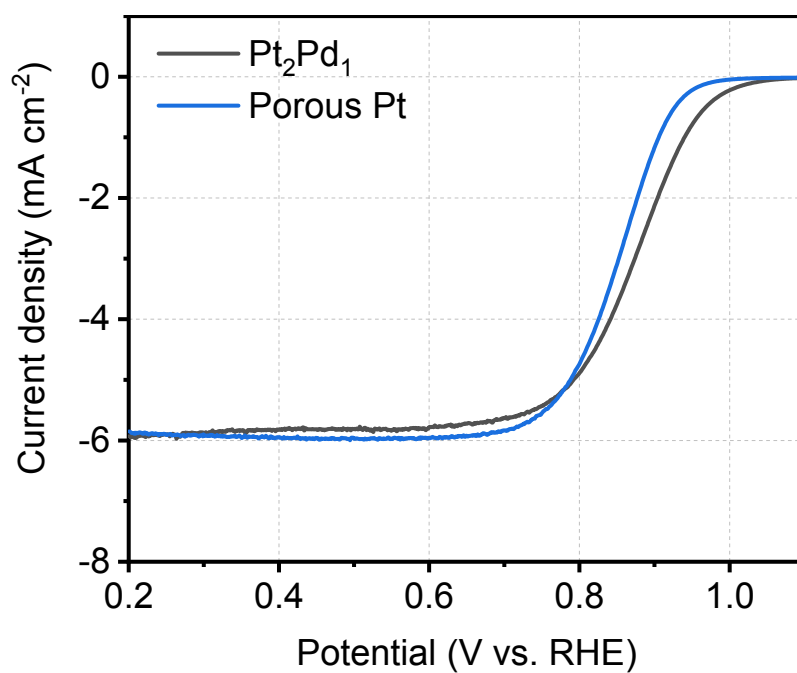

**Figure S11.** LSVs of  $\text{Pt}_2\text{Pd}_1$  and porous Pt in 0.1M KOH with a scan rate of  $5 \text{ mV s}^{-1}$  at 1600rpm.

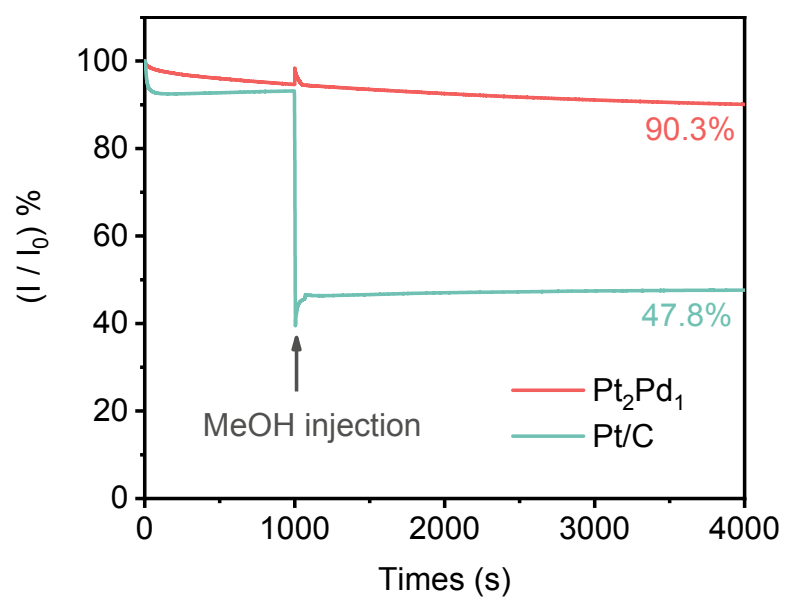

**Figure S12.** The methanol tolerance test of Pt<sub>2</sub>Pd<sub>1</sub> and Pt/C catalysts.



**Table S1** The average content of Pt and Pd from EDS results.

| Sample name                     | Pt wt. % | Pd wt. % | Pt/Pd molar ratio |
|---------------------------------|----------|----------|-------------------|
| Pt <sub>1</sub> Pd <sub>1</sub> | 61.41    | 38.59    | 0.89              |
| Pt <sub>2</sub> Pd <sub>1</sub> | 75.12    | 24.88    | 1.65              |
| Pt <sub>3</sub> Pd <sub>1</sub> | 83.20    | 16.80    | 2.7               |

**Table S2** The molar ratio of Pt and Pd calculated from ICP results.

| Sample name                     | Pt/Pd molar ratio |
|---------------------------------|-------------------|
| Pt <sub>1</sub> Pd <sub>1</sub> | 0.92              |
| Pt <sub>2</sub> Pd <sub>1</sub> | 1.85              |
| Pt <sub>3</sub> Pd <sub>1</sub> | 2.97              |

**Table S3** The on-set and half-wave potentials for the catalysts in our work and other reported literatures.

| Catalyst                             | E <sub>on-set</sub><br>(V vs. RHE) | E <sub>1/2</sub><br>(V vs. RHE) | Reference |
|--------------------------------------|------------------------------------|---------------------------------|-----------|
| Pt <sub>2</sub> Pd <sub>1</sub>      | 0.967                              | 0.889                           | This work |
| Pt <sub>46</sub> Pd <sub>54</sub>    | 0.9                                | 0.72                            | Ref.1     |
| Pt <sub>2</sub> Pd <sub>3</sub> /CKN |                                    | 0.821                           | Ref.2     |
| PtPd NSs                             |                                    | 0.879                           | Ref.3     |

|                   |      |       |       |
|-------------------|------|-------|-------|
| PtPd NRs/C        |      | 0.889 | Ref.4 |
| PtPd/(rGO:MWCNT)  | 0.86 |       | Ref.5 |
| PtPd nanocube-rGO |      | 0.829 | Ref.6 |

## Reference

- [1] Ghosh, S.; Sahu, R. K.; Retna Raj, C. Pt-Pd Alloy Nanoparticle-Decorated Carbon Nanotubes: A Durable and Methanol Tolerant Oxygen Reduction Electrocatalyst. *Nanotechnology* **2012**, *23*, 385602.
- [2] Li, D.; Fang, H.; Yu, J.; Xu, M.; Li, T.; Wang, J. Porous Carbon Supported PtPd Alloy Nanoparticles Derived From N-Heterocyclic Carbene Bimetal Complex As Efficient Bifunctional Electrocatalysts. *Electrochim. Acta* **2020**, *337*, 135855.
- [3] Chen, H. Y.; Jin, M. X.; Zhang, L.; Wang, A. J.; Yuan, J.; Zhang, Q. L.; Feng, J. J. One-Pot Aqueous Synthesis of Two-Dimensional Porous Bimetallic PtPd Alloyed Nanosheets As Highly Active and Durable Electrocatalyst for Boosting Oxygen Reduction and Hydrogen Evolution. *J. Colloid Interface Sci.* **2019**, *543*, 1–8.
- [4] Sun, Y.; Zhang, X.; Luo, M.; Chen, X.; Wang, L.; Li, Y.; Li, M.; Qin, Y.; Li, C.; Xu, N.; *et al.* Ultrathin PtPd-Based Nanorings with Abundant Step Atoms Enhance Oxygen Catalysis. *Adv. Mater.* **2018**, *30*, e1802136.
- [5] Rivera-Lugo, Y. Y.; Pérez-Muñoz, K. I.; Trujillo-Navarrete, B.; Silva-Carrillo, C.; Reynoso-Soto, E. A.; Calva-Yañez, J. C.; Lin, S. W.; Flores-Hernández, J. R.; Félix-Navarro, R. M. PtPd Hybrid Composite Catalysts as Cathodes for Proton Exchange Membrane Fuel Cells. *Energies* **2020**, *13*, 316.
- [6] Bai, S.; Wang, C.; Jiang, W.; Du, N.; Li, J.; Du, J.; Long, R.; Li, Z.; Xiong, Y. Etching Approach to Hybrid Structures of PtPd Nanocages and Graphene for Efficient Oxygen Reduction Reaction Catalysts. *Nano Res.* **2015**, *8*, 2789–2799.
